# Supplementary material for: Long-term survival in patients with septic acute kidney injury is strongly influenced by renal recovery
Source: PubMed Central journal article supplement (PMC5988328; doi:10.1371/journal.pone.0198269), 2018-06-05
Supplement: pone.0198269.s001.pdf [file pone.0198269.s001.pdf]

**Supplementary Table 1.** Sensitivity analysis for identifying risk factors associated with recovery of renal function by hospital discharge after imputation of missing data for cardiac disease and AKI on day 1 using MICE (Multivariate Imputation by Chained Equation).

|                                                                                                                                                                                                                                                                                                                                                                                  | <b>Odds ratio<br/>(OR)</b> | <b>95%<br/>Confidence<br/>interval</b> | <b>p-value</b> |
|----------------------------------------------------------------------------------------------------------------------------------------------------------------------------------------------------------------------------------------------------------------------------------------------------------------------------------------------------------------------------------|----------------------------|----------------------------------------|----------------|
| Baseline SCr                                                                                                                                                                                                                                                                                                                                                                     | 13.24                      | 2.52-69.73                             | 0.002          |
| Cardiac disease                                                                                                                                                                                                                                                                                                                                                                  | 0.54                       | 0.28-1.04                              | 0.07           |
| APACHE III score (day 1)                                                                                                                                                                                                                                                                                                                                                         | 1.03                       | 1.01-1.05                              | 0.003          |
| AKI on day 1                                                                                                                                                                                                                                                                                                                                                                     | 0.13                       | 0.07-0.26                              | <0.001         |
| In-hospital RRT                                                                                                                                                                                                                                                                                                                                                                  | 0.05                       | 0.01-0.52                              | 0.01           |
| <p>Adjusted for presence of chronic kidney disease at baseline.<br/>Multi-variable logistic regression is used. Cardiac disease and AKI on day 1 were imputed by MICE (Multivariate Imputation By Chained Equations)</p> <p>AKI: acute kidney injury; SCr: serum creatinine; APACHE III: acute physiologic and chronic health evaluation III; RRT: renal replacement therapy</p> |                            |                                        |                |
