# Supplementary material for: Long-term survival in patients with septic acute kidney injury is strongly influenced by renal recovery
Source: PLoS One. 2018 Jun 5;13(6):e0198269. doi: 10.1371/journal.pone.0198269 (PMC5988328; doi:10.1371/journal.pone.0198269)
Supplement: S2 Table — (PDF) [file pone.0198269.s002.pdf]

**Supplementary Table 2.** Sensitivity analysis for identifying risk factors associated with recovery of renal function by hospital discharge including non-survivors to hospital discharge (n=314<sup>+</sup>)

|                                                                                                                                                                                                                                                                                           | <b>Odds ratio<br/>(OR)</b> | <b>95%<br/>Confidence<br/>interval</b> | <b>p-value</b> |
|-------------------------------------------------------------------------------------------------------------------------------------------------------------------------------------------------------------------------------------------------------------------------------------------|----------------------------|----------------------------------------|----------------|
| Age                                                                                                                                                                                                                                                                                       | 0.98                       | 0.96-1.00                              | 0.02           |
| Baseline SCr                                                                                                                                                                                                                                                                              | 5.93                       | 1.44-24.37                             | 0.01           |
| AKI on day 1                                                                                                                                                                                                                                                                              | 0.30                       | 0.18-0.53                              | <0.001         |
| In-hospital RRT                                                                                                                                                                                                                                                                           | 0.14                       | 0.02-0.87                              | 0.03           |
| <p>* Adjusted for presence of chronic kidney disease at baseline<br/>Multi-variable logistic regression is used<br/>+: missing n=10 for variable AKI on day 1. The analytic sample size is n=304.<br/>AKI: acute kidney injury; SCr: serum creatinine; RRT: renal replacement therapy</p> |                            |                                        |                |
